# Supplementary material for: Carbon dots from natural sources as theranostic agents: integrating fluorescence and ROS generation for photodynamic therapy
Source: Royal Society of Chemistry journal article supplement (doi:10.1039/d6ra01035k), 2026-04-22

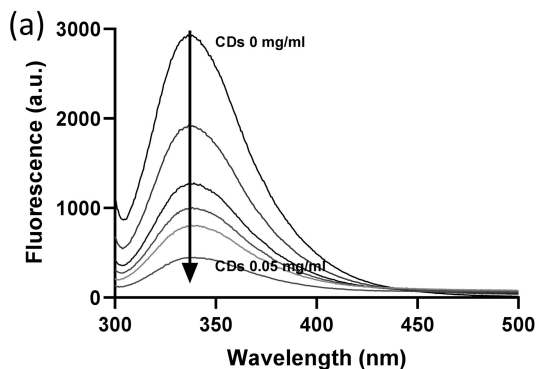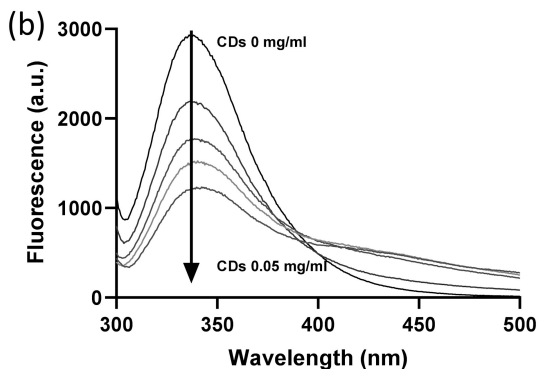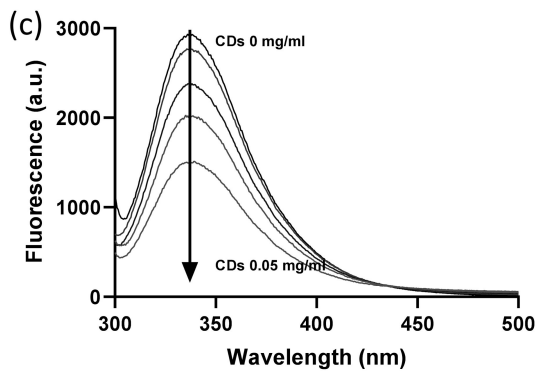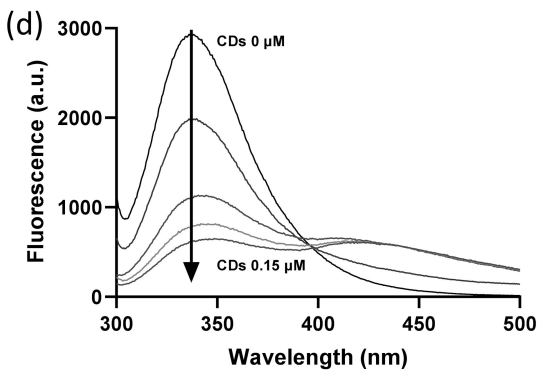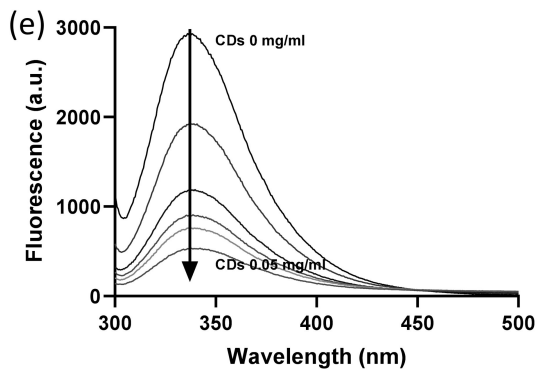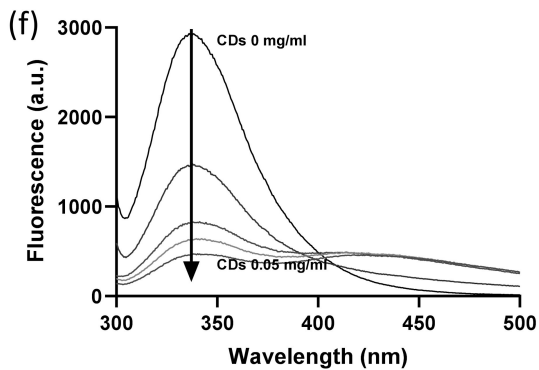

Supplement: d6ra01035k1.pdf [file d6ra01035k1.pdf]
